# Supplementary material
Source: PubMed Central journal article supplement (PMC2776500)

## S1A

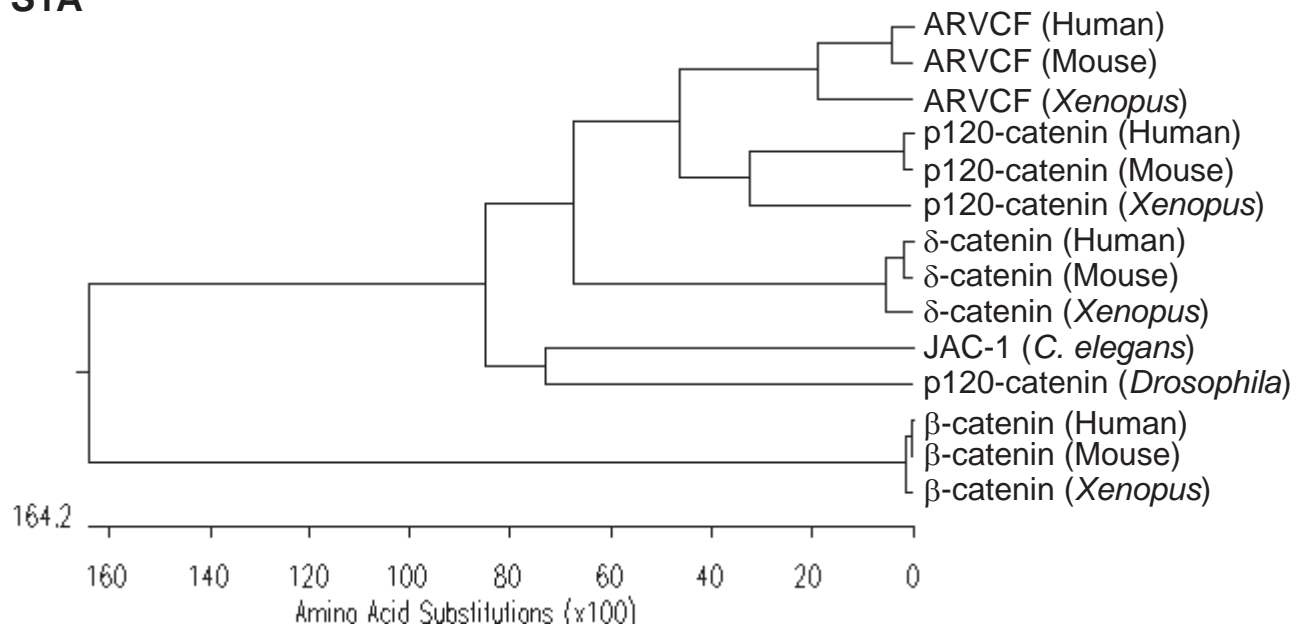

## S1B

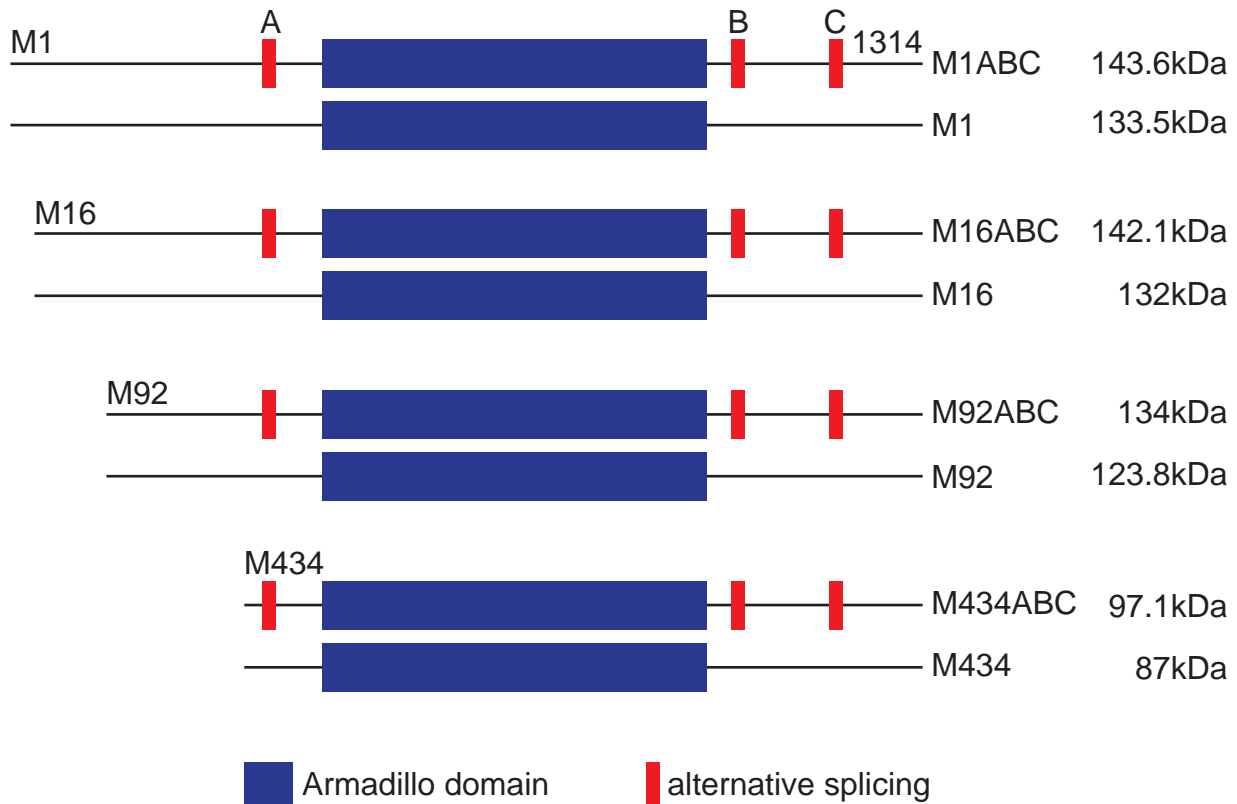

Supplement: supp_122_22_4049__1.pdf [file supp_122_22_4049__1.pdf]

## S4A

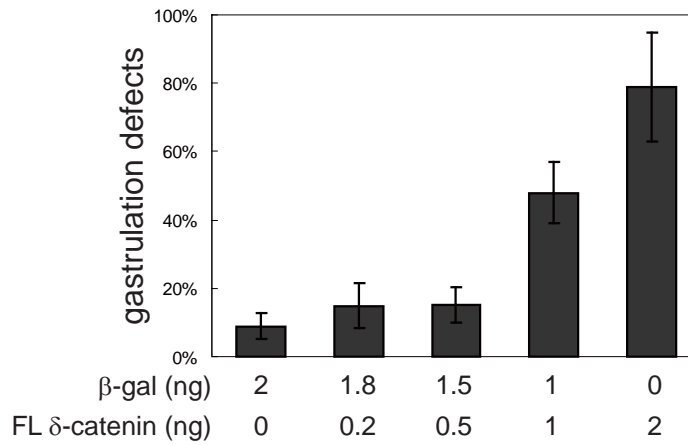

## S4B

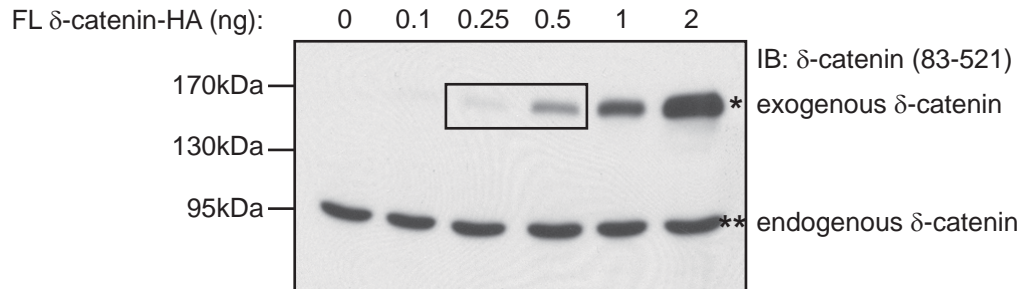

Supplement: supp_122_22_4049__4.pdf [file supp_122_22_4049__4.pdf]
